# Supplementary material for: Efficient oxidative degradation of organic pollutants in real industrial effluents using a green-synthesized magnetite supported on biochar catalyst
Source: Royal Society of Chemistry journal article supplement (doi:10.1039/d5ra04070a), 2025-01-01
Supplement: d5ra04070a1.pdf [file d5ra04070a1.pdf]

## **Efficient oxidative degradation of organic pollutants in real industrial effluents using a green-synthesized magnetite supported on biochar catalyst**

Mohamed Mohamed Gaber <sup>1\*</sup>, Arafat Toghan <sup>2</sup>, Hassan Shokry <sup>1\*</sup>, Mahmoud Samy <sup>3</sup>

<sup>1</sup> Environmental Engineering Department, Egypt-Japan University of Science and Technology (E-JUST), New Borg El-Arab City 21934, Alexandria, Egypt

E-mail: [mohamed.gaber@ejust.edu.eg](mailto:mohamed.gaber@ejust.edu.eg), [engineermohamedgaber@gmail.com](mailto:engineermohamedgaber@gmail.com)

E-mail: [hassan.shokry@ejust.edu.eg](mailto:hassan.shokry@ejust.edu.eg)

<sup>2</sup> Chemistry Department, College of Science, Imam Mohammad Ibn Saud Islamic University (IMSIU), Riyadh 11623, Saudi Arabia

E-mail: [aatahmed@imamu.edu.sa](mailto:aatahmed@imamu.edu.sa), [arafat.toghan@yahoo.com](mailto:arafat.toghan@yahoo.com)

<sup>3</sup> Public Works Engineering Department, Faculty of Engineering, Mansoura University, Mansoura 35516, Egypt

E-mail: [msa203050@mans.edu.eg](mailto:msa203050@mans.edu.eg)

---

Corresponding authors:

\* E-mail: [mohamed.gaber@ejust.edu.eg](mailto:mohamed.gaber@ejust.edu.eg), [engineermohamedgaber@gmail.com](mailto:engineermohamedgaber@gmail.com), (M.M. Gaber),  
Tel: +201023798513

\* E-mail: [hassan.shokry@ejust.edu.eg](mailto:hassan.shokry@ejust.edu.eg), (H. Shokry), Tel: +201282305425

## Supplementary texts

### Text S1. Chemicals

Tetracycline ( $C_{22}H_{24}N_2O_8$ , 98%), atrazine ( $C_8H_{14}ClN_5$ , 98%), chlorpyrifos ( $C_9H_{11}Cl_3NO_3PS$ , 97%), methylene blue ( $C_{16}H_{18}ClN_3S$ , ACS reagent grade, 90%), potassium periodate ( $KIO_4$ , ACS reagent grade, 99.8%), sodium iodate ( $NaIO_3$ , ACS reagent grade,  $\geq 99\%$ ), L-Histidine ( $C_6H_9N_3O_2$ , ACS reagent grade,  $\geq 99.5\%$ ), iron (III) chloride hexahydrate ( $FeCl_3 \cdot 6H_2O$ , ACS reagent grade, 97%), and L-Ascorbic acid ( $C_6H_8O_6$ , ACS reagent grade,  $\geq 99\%$ ) were purchased from Sigma-Aldrich Co. (USA). Paracetamol ( $C_8H_9NO_2$ , 98%), hydrogen peroxide ( $H_2O_2$ , 30%), ethanol ( $C_2H_6O$ , HPLC grade, 99.8%), acetonitrile ( $C_2H_3N$ , HPLC grade, 99.9%), phosphoric acid ( $H_3PO_4$ , HPLC grade, 85%), sodium hydroxide ( $NaOH$ , ACS reagent grade), methanol ( $CH_4O$ , 99.9%), chloroform ( $CHCl_3$ , 99.5%), and phenol ( $C_6H_5OH$ , ACS reagent grade,  $\geq 98\%$ ) were supplied from Fischer Chemical Co. Ltd. (UK). Potassium persulphate ( $K_2S_2O_8$ , 99.5%), potassium peroxymonosulfate ( $KHSO_5$ , 99.9%), hydrochloric acid ( $HCl$ , analytical grade, 37%), sulfuric acid ( $H_2SO_4$ , analytical grade, 95-97%), sodium thiosulfate ( $Na_2O_3S_2$ , analytical grade,  $\geq 97\%$ ), and iron (II) sulfate heptahydrate ( $FeSO_4 \cdot 7H_2O$ , ACS reagent grade, 99.5%) were obtained from Merck Chemical Co. Ltd. (Germany).

### Text S2. Water lettuce powder preparation

The collected water lettuce samples were initially rinsed with running tap water to eliminate surface contaminants. Subsequently, the samples were air-dried under natural sunlight to reduce moisture content. The dried plants were then cut into small fragments and dried in a drying oven (ED53, BINDER, USA) at 105 °C for 24 h to enhance brittleness and facilitate uniform grinding. The resulting dried leaves were mechanically ground using an electrical blender into a fine powder with a particle size of less than 100  $\mu m$ . The produced powder was subjected to three consecutive washing cycles with ethanol, each followed by centrifugation (EBA 20, Hettich,

USA). Subsequently, the powder was treated with 1 M hydrochloric acid at a 1:10 (solid-to-liquid) volume ratio at room temperature for 24 h <sup>1</sup>. The acid-treated powder was then thoroughly rinsed with deionized water multiple times until the wash solution reached a neutral pH. The pH value was confirmed using a multiparameter meter (HQ440d, HACH, USA) and a pH probe (PHC301, HACH, USA). Finally, the produced fine powder was dried overnight at 60.0 °C to obtain the purified water lettuce powder.

### **Text S3. Guava leaves extract formulation**

The purchased guava leaves were thoroughly washed with tap water followed by rinsing with deionized water to remove surface impurities. The cleaned leaves were then air-dried at room temperature in the dark for 1 week, followed by oven drying at 60 °C overnight to ensure complete moisture removal <sup>2</sup>. The dried leaves were ground into a fine powder and stored in plastic bags for later use. Subsequently, 40 g of the powdered leaves were mixed with 1 L of deionized water and heated at 80 °C for 2 h using a magnetic stirrer hotplate (MSH-20D, Daihan Scientific, Vietnam) <sup>3</sup>. The resulting suspension was then filtered through Whatman No. 1 filter paper to obtain a clear plant extract with a concentration of 40 g/L. The extract was cooled to room temperature and stored at 4 °C for subsequent applications.

### **Text S4. Synthesis of the water lettuce biochar (WLBC)**

The WLBC was synthesized by pyrolyzing the pre-treated water lettuce powder at 600 °C for 2 h in a muffle furnace (AMF 25 N, Asahi-Rika, Japan) under a nitrogen atmosphere <sup>4</sup>. The resulting black powder was subsequently washed and centrifuged three times with ethanol, followed by three additional washes with deionized water to obtain purified WLBC <sup>5</sup>.

### **Text S5. Biosynthesis of magnetite nanoparticles**

In a 250 mL beaker, ferrous sulfate heptahydrate (4 g) and ferric chloride hexahydrate (8 g) were dissolved in deionized water (100 ml) under continuous stirring for 30 min at room

temperature <sup>6</sup>. Under a nitrogen atmosphere, 20 mL of the pre-prepared guava leaf extract was added dropwise, and the mixture was stirred at 70 °C for 45 min. The resulting black precipitate was magnetically separated, washed three times with deionized water and ethanol under centrifugation, and dried at 60 °C overnight to yield magnetite nanoparticles <sup>7</sup>. The reaction pathway is illustrated in Eqs. (S1–S5) <sup>8,9</sup>. The magnetized water lettuce biochar (MWLB) was prepared by introducing the synthesized WLBC into the reaction mixture before the addition of the plant extract.

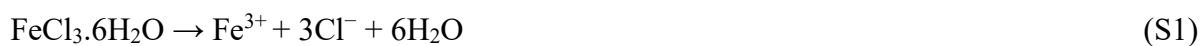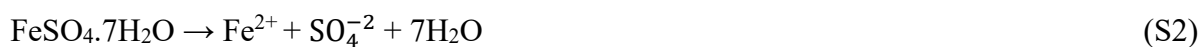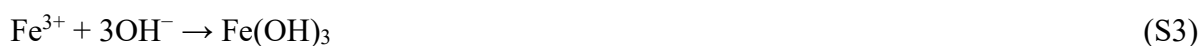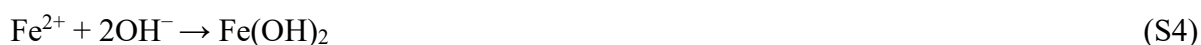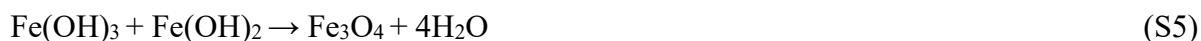

#### **Text S6. Characterization techniques**

The functional groups were characterized using Fourier-transform infrared (FTIR) spectroscopy (FTIR-8400S, Shimadzu, Japan). The crystalline structure of the samples was determined using an X-ray diffraction (XRD) system (XRD 6000, Shimadzu, Japan). Surface morphology was examined through transmission electron microscopy (TEM) model (JEM 2100F, JEOL, Japan). Elemental distribution analysis was conducted using energy-dispersive X-ray spectroscopy (EDS) with an X-Max 80 mm<sup>2</sup> detector (Oxford Instruments, UK).

#### **Text S7. Analytical methods**

At 10-min intervals, 3 mL aliquots were withdrawn using disposable syringes, filtered through 0.22 µm syringe filters, and immediately quenched with 200 µL of 1 M sodium thiosulfate solution in centrifuge tubes to neutralize residual oxidizing iodine species <sup>10</sup>. The concentrations of tetracycline (TCN), paracetamol, chlorpyrifos, methylene blue, and atrazine were determined

using a UV-Vis spectrophotometer (Evolution 350, Thermo Fisher Scientific, USA) at 357, 243, 244, 660, and 265 nm, respectively <sup>5,11,12</sup>. Additionally, the concentration of periodate ions ( $\text{IO}_4^-$ ) and iodate ions ( $\text{IO}_3^-$ ) were determined using a high-performance liquid chromatography (HPLC) system (LC-2040C, Shimadzu, Japan), equipped with a diode array detector and an autosampler. Chromatographic separation was conducted on an Agilent XDB-C18 column ( $4.6 \times 250$  mm,  $5 \mu\text{m}$ ) with a mobile phase composed of 0.1% phosphoric acid and acetonitrile in a 70:30 (v/v) ratio. The analytical conditions were as follows: detection wavelength of 228 nm, injection volume of  $10 \mu\text{L}$ , flow rate of  $1.0 \text{ mL/min}$ , retention time of 2.3 min, and a column temperature maintained at  $30^\circ\text{C}$ . These parameters were applied in accordance with the method reported by Xiong et al. <sup>13</sup>. The concentrations of  $\text{IO}_4^-$  and  $\text{IO}_3^-$  were determined by constructing calibration curves using standard solutions of  $\text{KIO}_4$  and  $\text{NaIO}_3$ , respectively, within the range of  $0\text{--}500 \mu\text{M}$  <sup>14,15</sup>. TCN degradation by-products were identified by a liquid chromatography-mass spectroscopy (LC-MS) model (LCMS-2020, Shimadzu, Japan) under chromatographic conditions as described by Huang et al. <sup>16</sup>. Total organic carbon (TOC) was determined using the TOC-L CPH/CPN analyzer (Shimadzu, Japan). Total dissolved solids were quantified following Standard Method 2540-C <sup>17</sup>. Electrical conductivity was measured using a multimeter (HQ440d, HACH, USA) equipped with a conductivity probe (CDC401, HACH, USA). Removal efficiencies (RE) of pollutants, TOC mineralization rates, and oxidant decomposition ratios during the degradation processes were calculated using Eq. (S6) <sup>18</sup>. Degradation kinetics were assessed by fitting the experimental data to a pseudo-first-order kinetic model, as described in Eq. (S7) <sup>19</sup>. The coefficient of determination ( $R^2$ ) was used to evaluate the model's fit. Additionally, the catalyst's adsorption capacity ( $Q$ ,  $\text{mg/g}$ ) was determined using Eq. (S8) <sup>20</sup>.

$$RE = \frac{C_o - C}{C_o} \times 100\% \quad (S6)$$

$$-\ln\left(\frac{C}{C_o}\right) = K_{obs} \cdot t \quad (S7)$$

$$Q = \frac{V(C_o - C)}{W} \quad (S8)$$

where  $C_o$  represents the pollutant initial concentration,  $C$  denotes the pollutant final concentration,  $K_{obs}$  refers to the kinetic rate constant ( $\text{min}^{-1}$ ),  $t$  corresponds the reaction time (min),  $V$  indicates to the reaction solution volume (L), and  $W$  is the mass of the catalyst (g).

## Supplementary figures

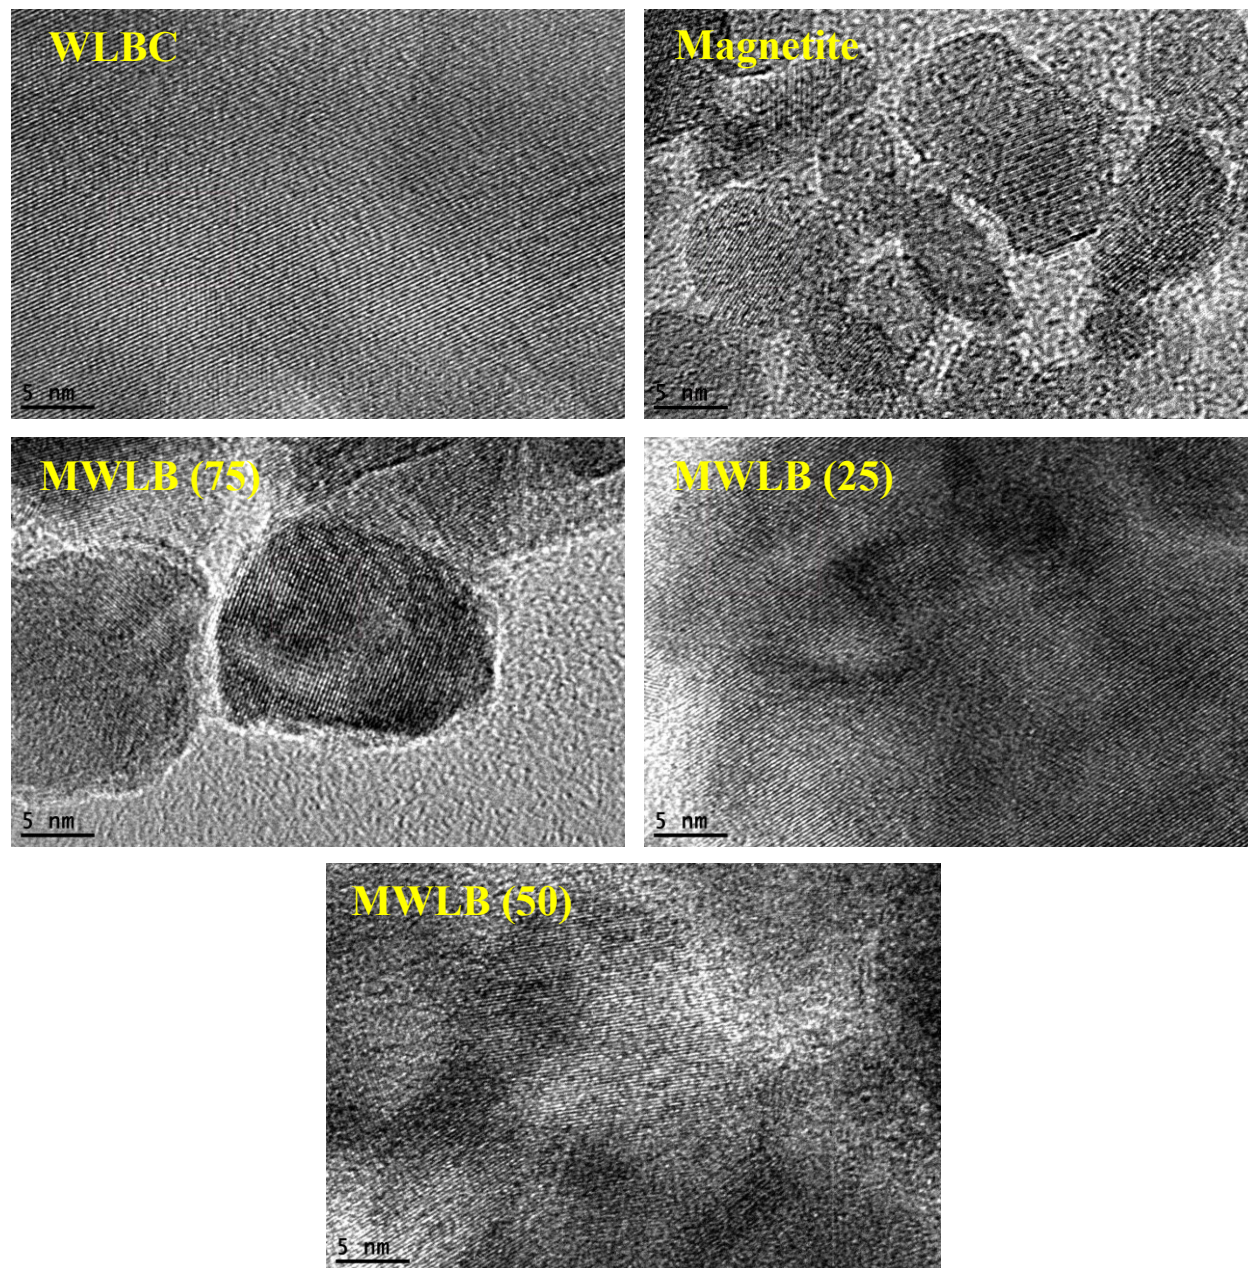

**Fig. S1.** High-resolution TEM (HRTEM) scans of the synthesized catalysts.



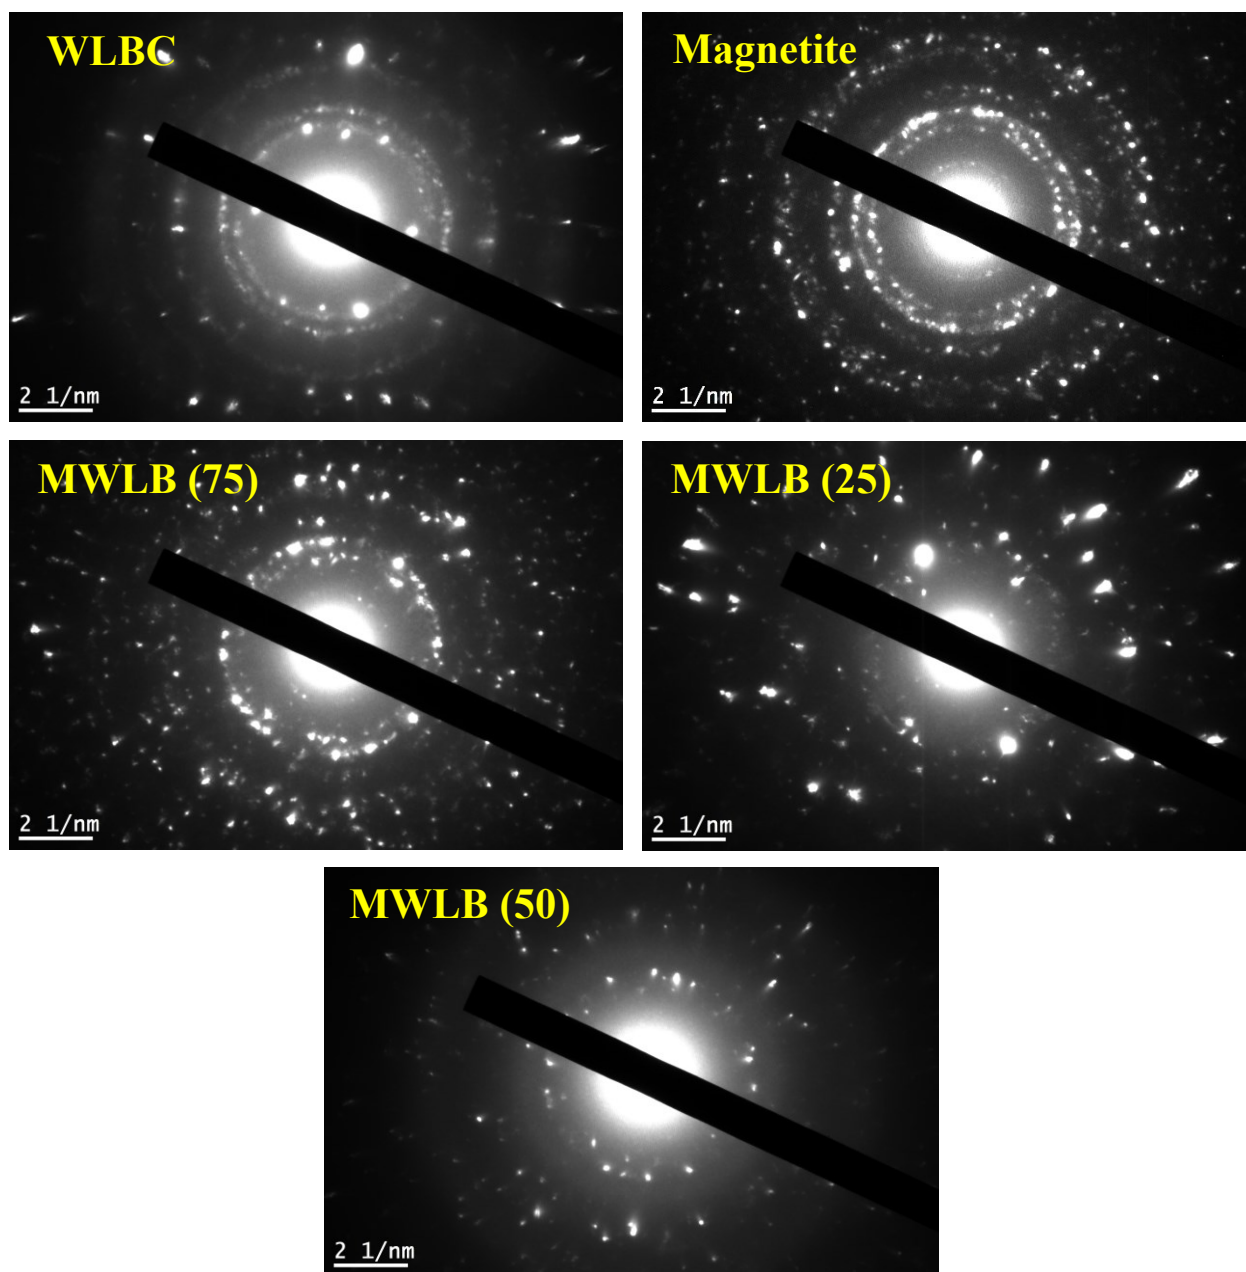

**Fig. S2.** Selected area electron diffraction (SAED) micrographs of the fabricated materials.



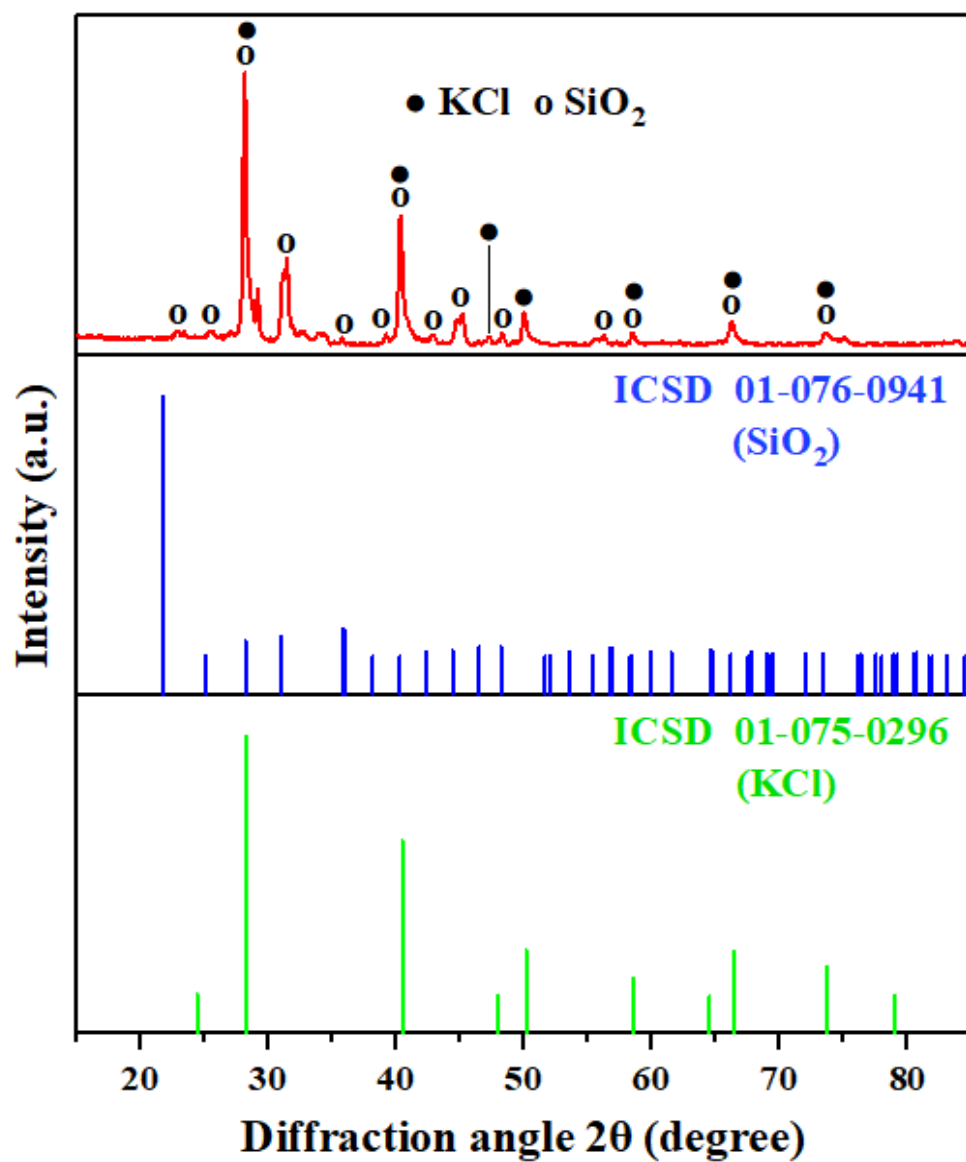

**Fig. S3.** XRD pattern the synthesized WLBC, compared to reference peaks from  $\text{SiO}_2$  and KCl standard cards.

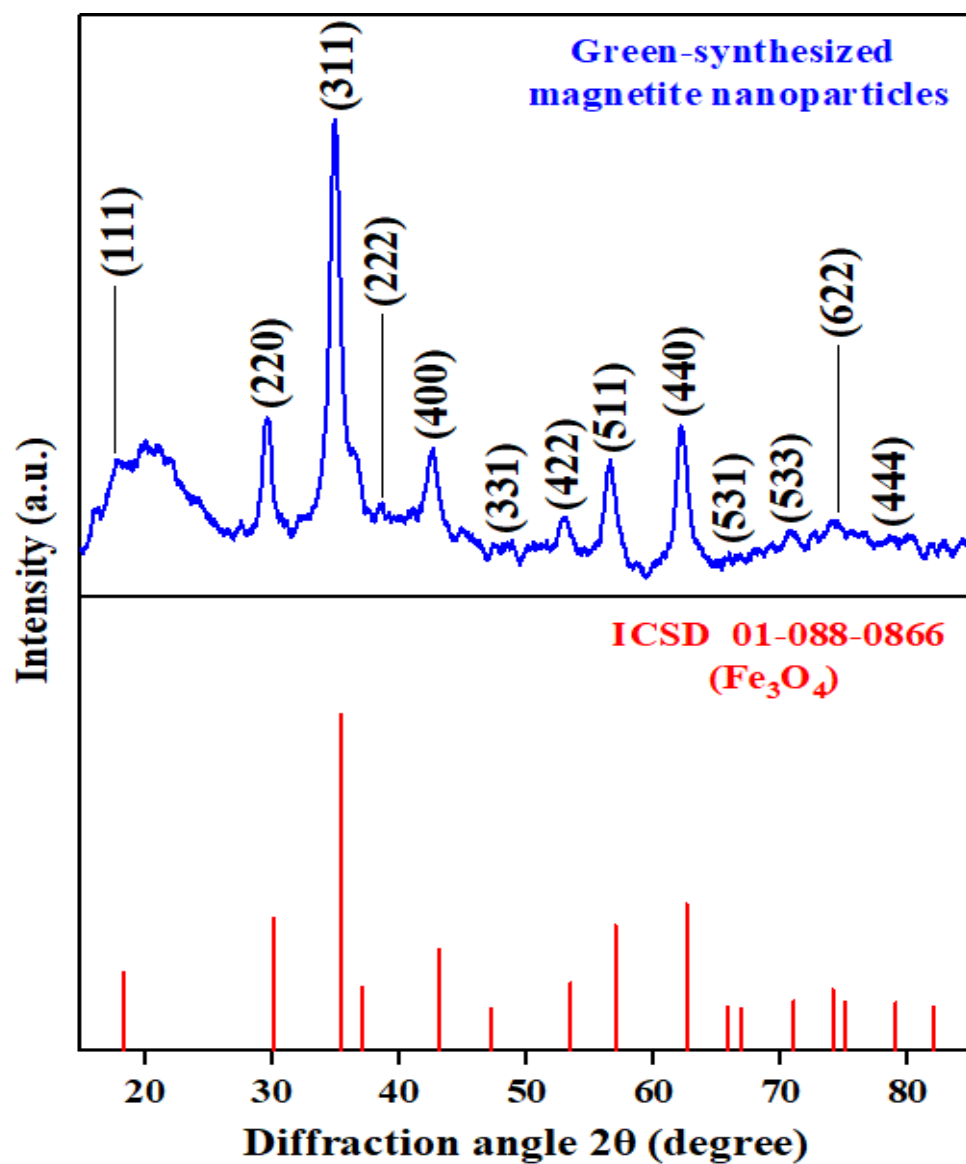

**Fig. S4.** XRD pattern of the green-synthesized magnetite nanoparticles reference to standard magnetite pattern (ICSD 01-088-0866).

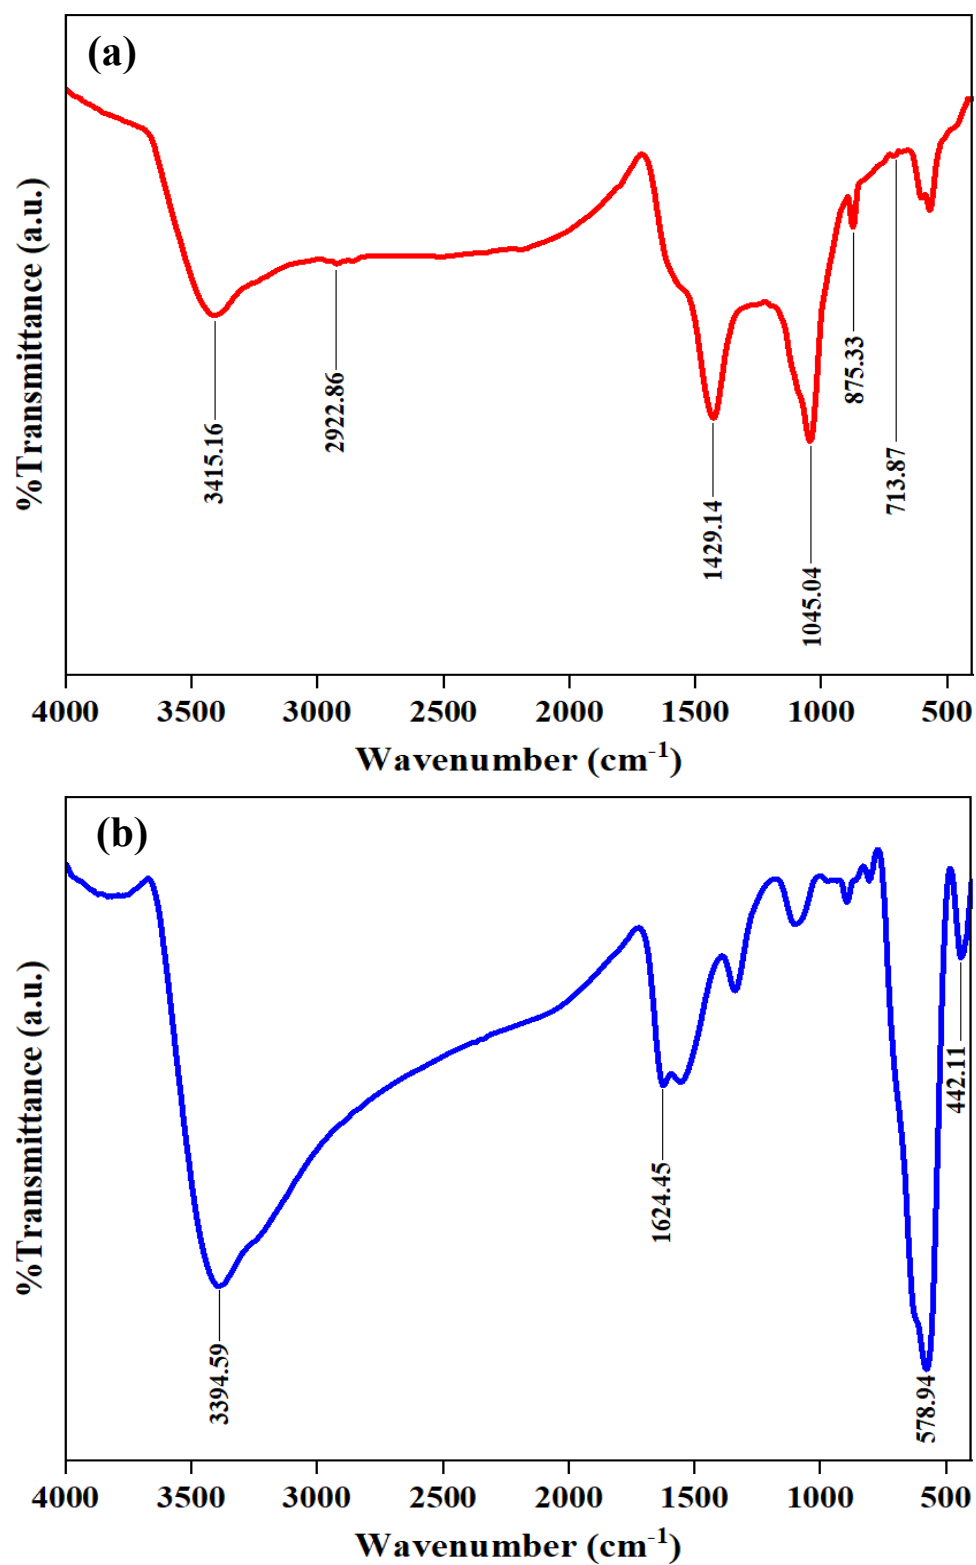

**Fig. S5.** FTIR spectra of (a) WLBC and (b) the green-synthesized magnetite nanoparticles.

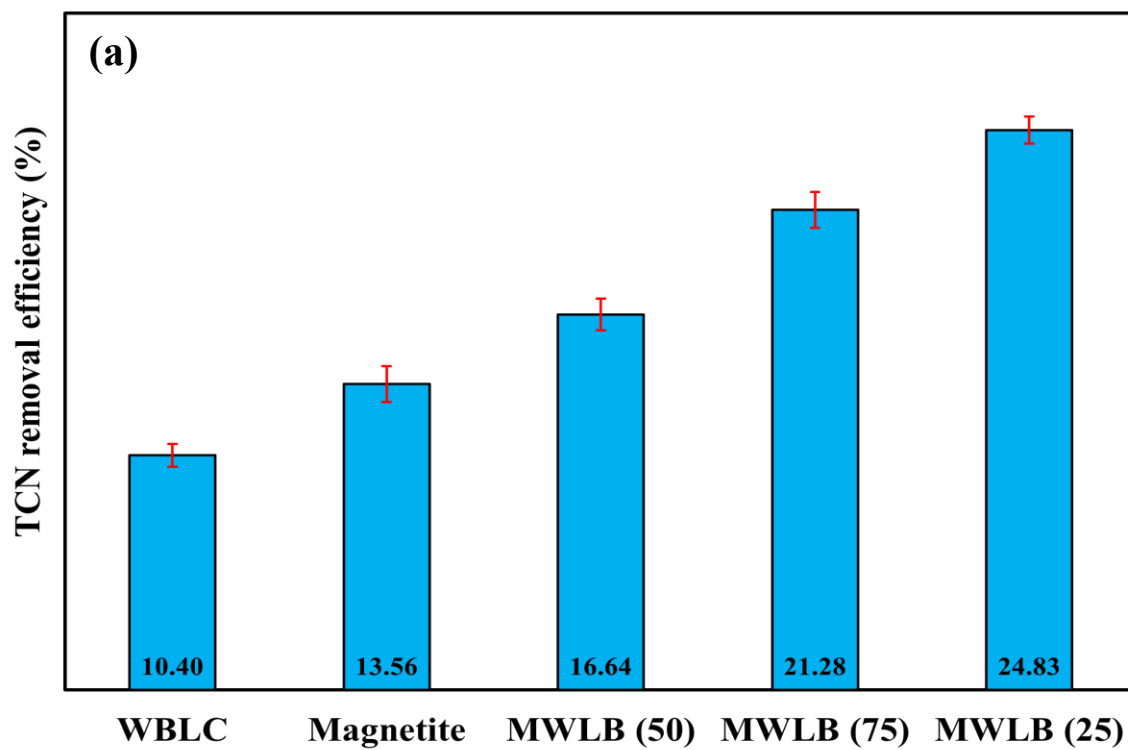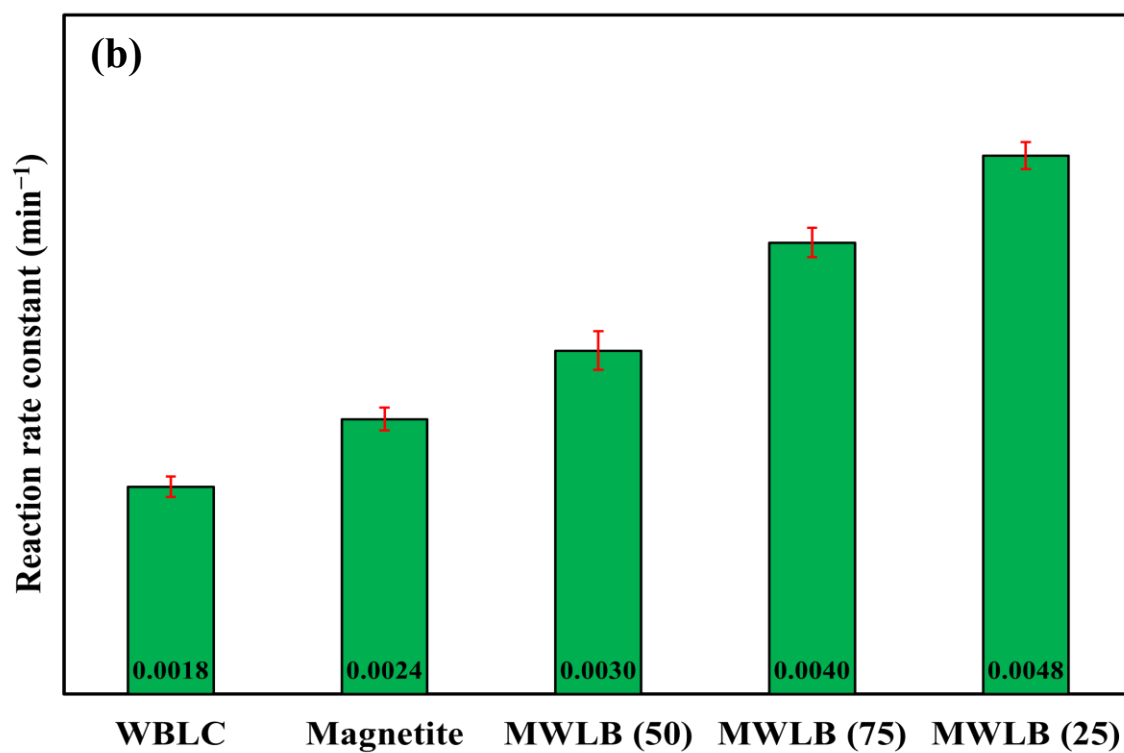

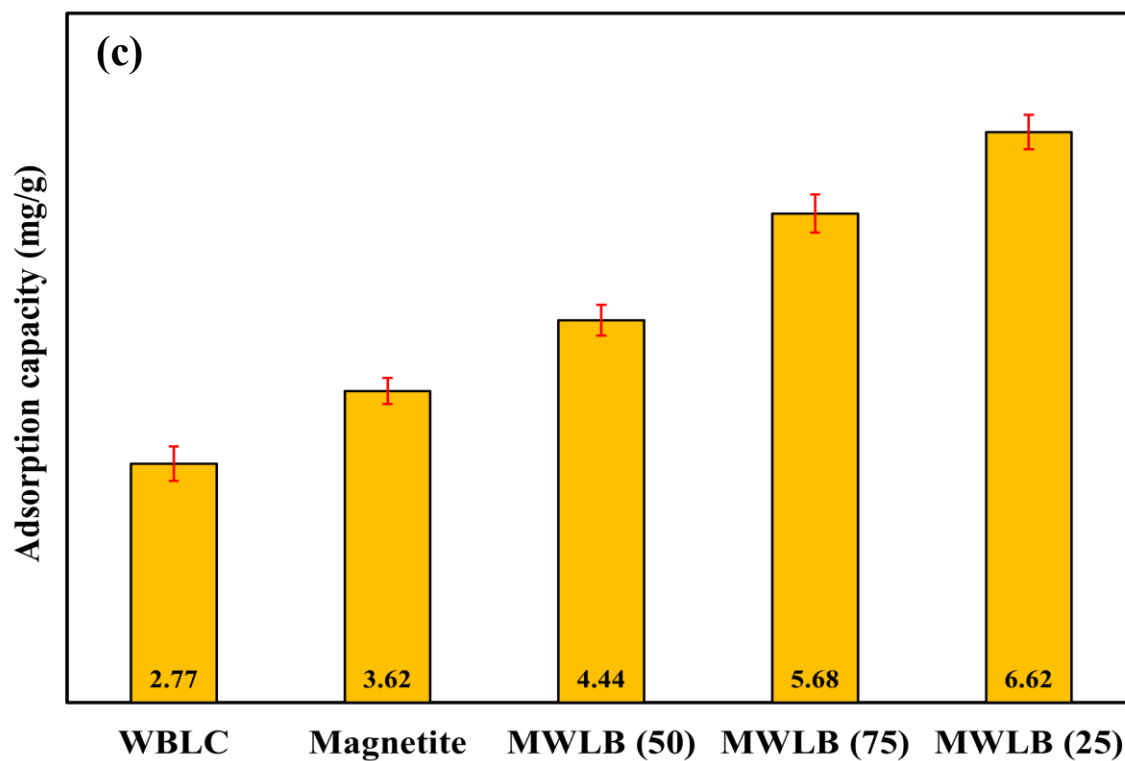

**Fig. S6.** Evaluation of the adsorption performance of the synthesized catalysts for TCN removal under the control conditions: (a) TCN degradation efficiency, (b) corresponding kinetic rate constants, and (c) calculated adsorption capacities.

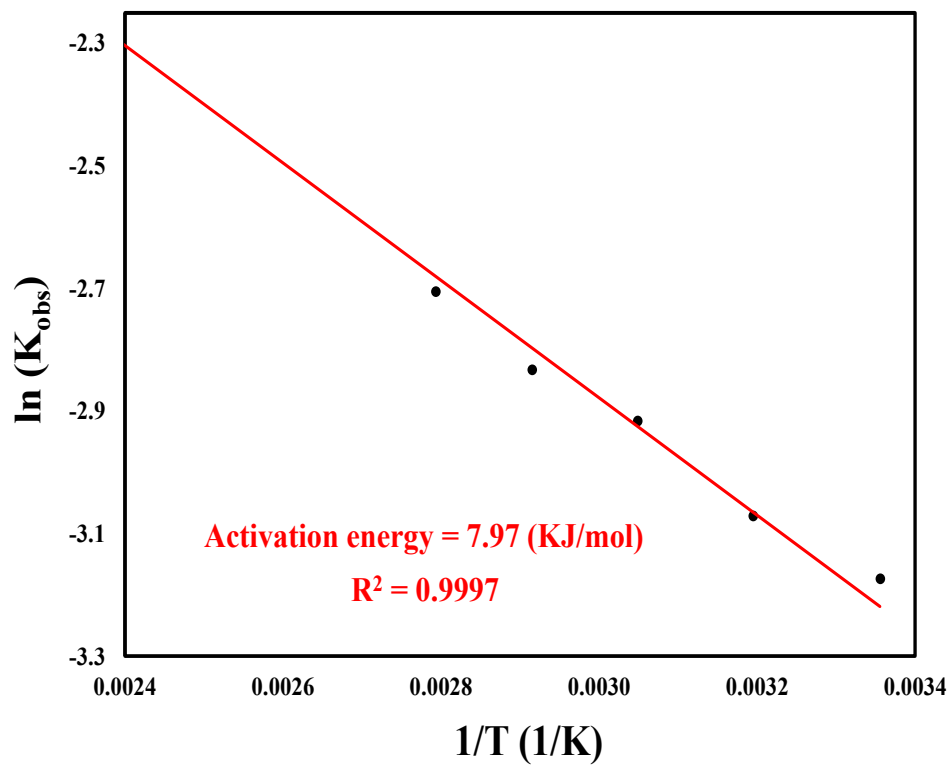

**Fig. S7.** Activation energy for TCN degradation in the MWLB (25)/PI system.

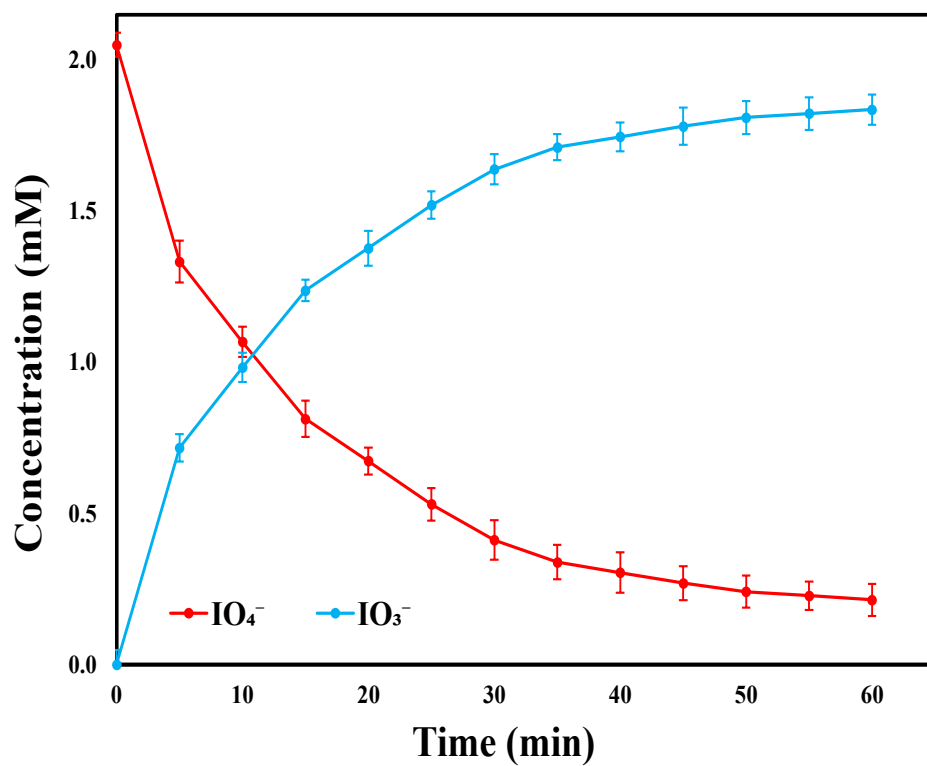

**Fig. S8.** Concentration of iodine species during TCN degradation in the MWLB (25)/PI system under the optimum conditions.

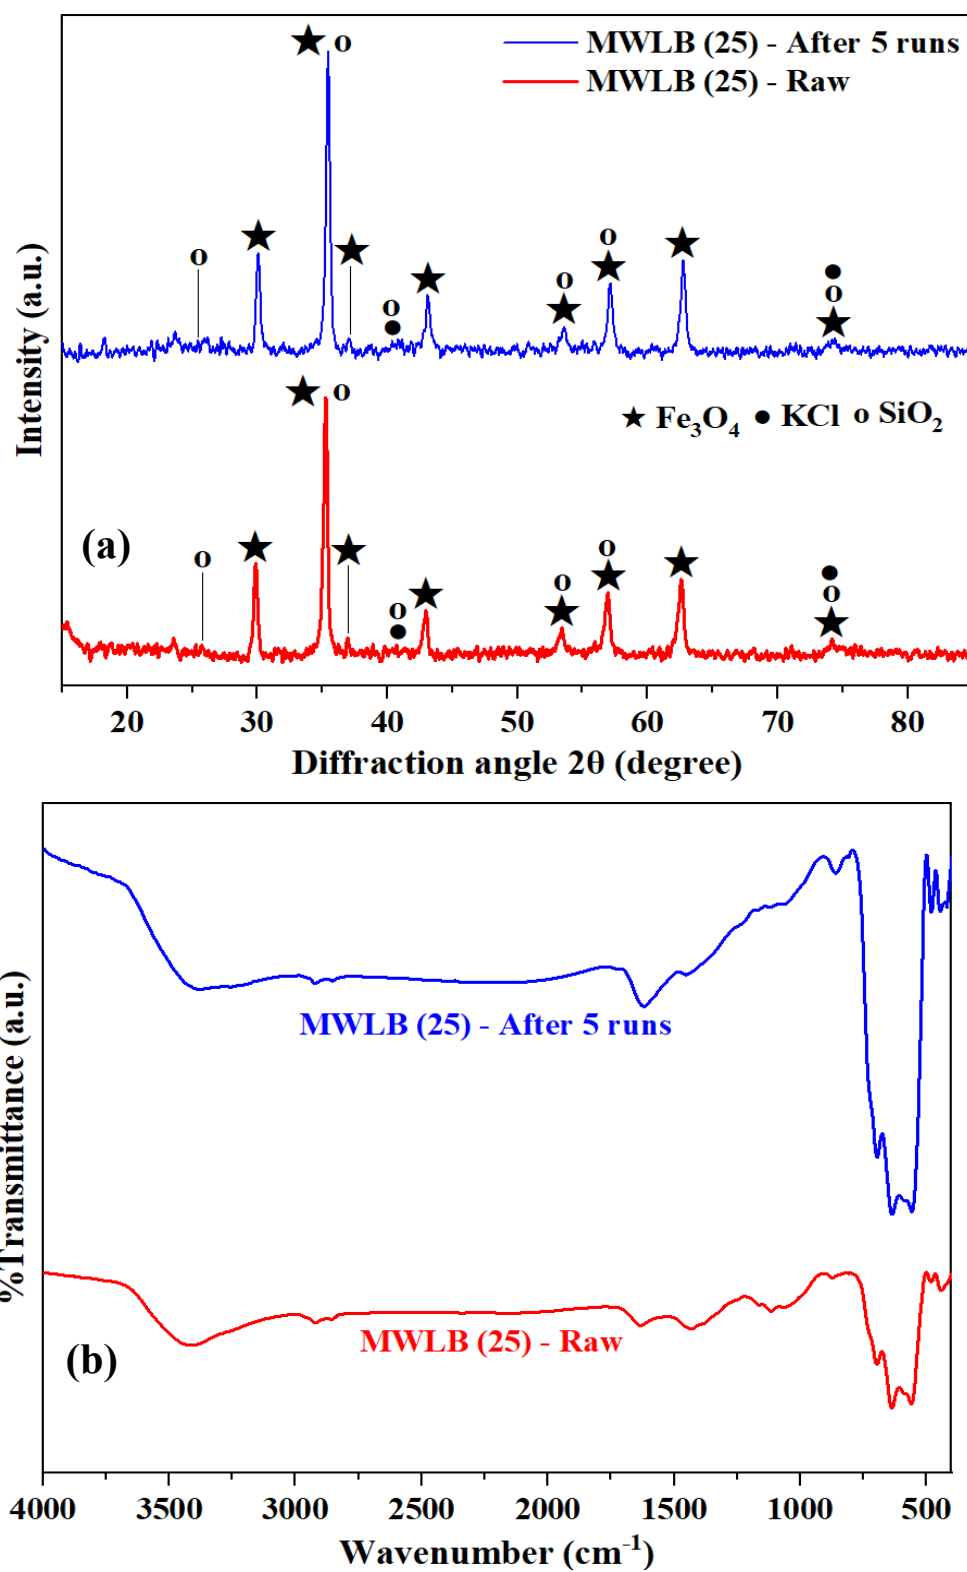

**Fig. S9.** (a) XRD patterns and (b) FTIR spectra of the MWLB (25) composite before and after five successive treatment cycles.



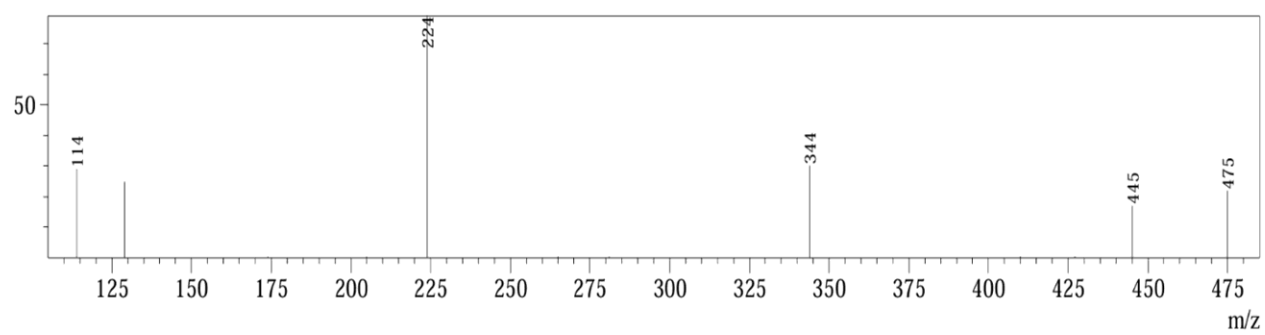

**Fig. S10.** The LC-MS spectra of TCN degradation in the MWLB (25)/PI system.

## Supplementary tables

**Table S1** Characterization of the real pharmaceutical industrial effluent.

| Parameter               | Concentration | Unit  |
|-------------------------|---------------|-------|
| TCN                     | 428.36        | mg/L  |
| Total organic carbon    | 1372.29       | mg/L  |
| pH                      | 7.48          | —     |
| Electrical conductivity | 1466.85       | μS/cm |
| Total dissolved solids  | 873.61        | mg/L  |

**Table S2** XRD 2 $\theta$  peak positions of the synthesized composites, along with their corresponding miller indices from standard reference data.

| The synthesized catalysts       |                 |                          |           | Reference cards  |     |            |     |                                |     |
|---------------------------------|-----------------|--------------------------|-----------|------------------|-----|------------|-----|--------------------------------|-----|
| MWLB (50)                       | MWLB (25) - Raw | MWLB (25) - After 5 runs | MWLB (75) | SiO <sub>2</sub> |     | KCl        |     | Fe <sub>3</sub> O <sub>4</sub> |     |
| Diffraction peaks (2 $\theta$ ) |                 |                          |           | 2 $\theta$       | hkl | 2 $\theta$ | hkl | 2 $\theta$                     | hkl |
| 18.45                           | 18.34           | 18.52                    | 18.33     | —                | —   | —          | —   | 18.31                          | 111 |
| 21.83                           | 21.76           | 21.9                     | 21.71     | 21.81            | 101 | —          | —   | —                              | —   |
| 24.72                           | 24.52           | 24.69                    | 24.52     | —                | —   | 24.49      | 111 | —                              | —   |
| 25.39                           | 25.11           | 25.16                    | 25.1      | 25.17            | 110 | —          | —   | —                              | —   |
| 28.05                           | 28.26           | 28.31                    | 28.36     | 28.24            | 111 | 28.38      | 200 | —                              | —   |
| 30.16                           | 30.29           | 30.66                    | 30.27     | —                | —   | —          | —   | 30.12                          | 220 |
| 31.06                           | 31.18           | 31.24                    | 31.32     | 31.09            | 102 | —          | —   | —                              | —   |
| 35.57                           | 35.89           | 35.44                    | 35.26     | 35.9             | 200 | —          | —   | 35.48                          | 311 |
| 36.04                           | 36.22           | 36.43                    | 36.18     | 36.02            | 112 | —          | —   | 37.11                          | 222 |
| 37.11                           | 37.21           | 37.36                    | 37.24     | —                | —   | —          | —   | 37.11                          | 222 |
| 38.46                           | 38.41           | 38.48                    | 38.22     | 38.19            | 201 | —          | —   | —                              | —   |
| 40.55                           | 40.41           | 40.47                    | 40.43     | 40.35            | 210 | 40.52      | 220 | —                              | —   |
| 42.61                           | 42.34           | 42.44                    | 42.55     | 42.4             | 211 | —          | —   | 43.11                          | 400 |
| 43.22                           | 43.27           | 43.51                    | 43.43     | —                | —   | —          | —   | 43.12                          | 400 |
| 44.44                           | 44.36           | 44.5                     | 44.68     | 44.46            | 202 | —          | —   | —                              | —   |
| 46.54                           | 46.52           | 46.73                    | 46.49     | 46.46            | 113 | —          | —   | —                              | —   |
| 47.84                           | 47.75           | 47.82                    | 47.69     | —                | —   | 47.96      | 311 | 47.21                          | 331 |
| 48.29                           | 48.36           | 48.47                    | 48.55     | 48.28            | 212 | —          | —   | —                              | —   |
| 50.37                           | 50.35           | 50.47                    | 50.23     | —                | —   | 50.19      | 222 | —                              | —   |
| 51.59                           | 51.54           | 51.59                    | 51.76     | 51.68            | 220 | —          | —   | —                              | —   |
| 52.16                           | 52.03           | 52.17                    | 52.12     | 52.01            | 004 | —          | —   | 53.5                           | 422 |
| 53.74                           | 53.41           | 53.57                    | 53.46     | 53.59            | 203 | —          | —   | 53.5                           | 422 |
| 55.53                           | 55.63           | 55.69                    | 55.6      | 55.41            | 104 | —          | —   | —                              | —   |
| 56.62                           | 56.96           | 56.57                    | 56.89     | 56.91            | 213 | —          | —   | 57.07                          | 511 |

|       |       |       |       |       |     |       |     |       |     |
|-------|-------|-------|-------|-------|-----|-------|-----|-------|-----|
| 58.53 | 58.68 | 58.71 | 58.64 | 58.33 | 310 | 58.66 | 400 | —     | —   |
| 59.89 | 59.75 | 59.75 | 59.99 | 59.94 | 311 | —     | —   | —     | —   |
| 61.67 | 61.73 | 61.77 | 61.71 | 61.56 | 302 | —     | —   | —     | —   |
| 62.85 | 62.6  | 62.74 | 62.53 | —     | —   | —     | —   | 62.62 | 440 |
| 64.63 | 64.79 | 64.87 | 64.59 | 64.61 | 312 | 64.58 | 331 | —     | —   |
| 65.77 | 65.83 | 65.93 | 65.79 | —     | —   | —     | —   | 65.86 | 531 |
| 66.54 | 66.79 | 66.75 | 66.67 | 66.20 | 223 | 66.4  | 420 | 66.90 | 442 |
| 67.79 | 67.76 | 67.76 | 67.98 | 67.81 | 214 | —     | —   | —     | —   |
| 68.83 | 68.99 | 68.95 | 68.85 | 69    | 321 | —     | —   | —     | —   |
| 69.13 | 69.3  | 69.32 | 69.25 | 69.44 | 105 | —     | —   | —     | —   |
| 71.12 | 71.27 | 71.28 | 71    | —     | —   | —     | —   | 71.05 | 620 |
| 72.21 | 72.18 | 72.22 | 72.09 | 72.1  | 313 | —     | —   | —     | —   |
| 73.79 | 73.39 | 73.33 | 73.62 | 73.36 | 322 | 73.71 | 422 | —     | —   |
| 74.13 | 74.17 | 74.17 | 74.11 | —     | —   | —     | —   | 74.5  | 533 |
| 75.14 | 75.15 | 75.12 | 75.15 | —     | —   | —     | —   | 75.09 | 622 |
| 76.25 | 76.42 | 76.43 | 76.51 | 76.4  | 224 | —     | —   | —     | —   |
| 77.61 | 77.65 | 77.67 | 77.77 | 77.95 | 205 | —     | —   | —     | —   |
| 78.92 | 78.85 | 78.73 | 78.97 | 78.90 | 410 | —     | —   | —     | —   |
| 79.01 | 79.13 | 79.3  | 79.14 | 79.18 | 304 | 79.05 | 511 | 79.06 | 444 |
| 80.55 | 80.58 | 80.49 | 80.65 | 80.44 | 323 | —     | —   | —     | —   |

**Table S3** FTIR peaks (cm<sup>-1</sup>) of the synthesized MWLB composites.

| MWLB (50)                          | MWLB (25) -<br>Raw                   | MWLB (25) -<br>After 5 runs          | MWLB (75)          |
|------------------------------------|--------------------------------------|--------------------------------------|--------------------|
| —                                  | 3413.81                              | 3377.75                              | 3366.35            |
| —                                  | 2921.61<br>2857.65                   | 2920.83                              | 2916.06<br>2857.15 |
| 1598.0                             | 1632.16                              | 1619.51                              | 1616.06            |
| 1428.73                            | 1431.28                              | 1451.83                              | 1432.91            |
| 1126.26                            | 1161.42<br>1116.06<br>1062.52        | —                                    | 1047.44            |
| 874.95                             | 872.93                               | 859.24                               | 878.92             |
| 557.8<br>478.48<br>440.71<br>418.7 | 559.37<br>481.27<br>441.02<br>418.97 | 557.85<br>479.67<br>444.49<br>418.59 | 560.84<br>442.64   |

**Table S4** Comparison of activation energies for TCN degradation in different AOPs.

| System                                                             | Temperature range (°C) | Activation energy (KJ/mol) | Reference  |
|--------------------------------------------------------------------|------------------------|----------------------------|------------|
| MWLB (25)/PI                                                       | 25–85                  | 7.97                       | This study |
| Ultrasound/persulfate                                              | 25–65                  | 32.01                      | 21         |
| Heat/persulfate                                                    | 40–70                  | 70.48                      | 22         |
| Electro-Fenton process                                             | 15–35                  | 32.2                       | 23         |
| Heat/PI                                                            | 30–80                  | 46.2                       | 24         |
| Fe, Co, and O co-doped g-C <sub>3</sub> N <sub>4</sub> /persulfate | 15–35                  | 23.88                      | 25         |
| N-doped carbon nanotubes encapsulated cobalt/PI                    | 15–45                  | 8.87                       | 26         |

**Table S5** Comparative degradation performance of the MWLB (25)/PI system and various reported AOP systems employing different catalysts.

| AOP system     | Catalyst/light source                                                                                                         | Operating conditions                                                                                                                                            | Removal ratio | Reference |
|----------------|-------------------------------------------------------------------------------------------------------------------------------|-----------------------------------------------------------------------------------------------------------------------------------------------------------------|---------------|-----------|
| Photocatalysis | Fe <sub>3</sub> O <sub>4</sub> /rGO/TiO <sub>2</sub> nanocomposite<br>Xenon lamp (150 W)                                      | [TCH] <sub>o</sub> = 20 mg/L,<br>[Catalyst] <sub>o</sub> = 0.6 g/L,<br>pH = 6,<br>T = 25 °C, and<br>reaction time = 330 min.                                    | 93.1%         | 27        |
| PI activation  | Chalcopyrite (CuFeS <sub>2</sub> )                                                                                            | [TCH] <sub>o</sub> = 50 mg/L,<br>[Catalyst] <sub>o</sub> = 0.3 g/L,<br>[PI] <sub>o</sub> = 0.8 mM,<br>pH = 8, and<br>reaction time = 90 min.                    | 89.5%         | 28        |
| Photocatalysis | Fe <sub>3</sub> O <sub>4</sub> /graphitic carbon nitride (g-C <sub>3</sub> N <sub>4</sub> )/rGO<br>Xenon lamp (300 W, 420 nm) | [TCH] <sub>o</sub> = 10 mg/L,<br>[Catalyst] <sub>o</sub> = 0.1 g/L,<br>pH = 6,<br>T = 25 °C, and<br>reaction time = 60 min.                                     | 86.7%         | 29        |
| PI activation  | Potassium ferrate modified biochar (Fe-BC)                                                                                    | [TCN] <sub>o</sub> = 20.3 mg/L,<br>[Catalyst] <sub>o</sub> = 1.09 g/L,<br>[PI] <sub>o</sub> = 3.29 mM,<br>pH = 3,<br>T = 25 °C, and<br>reaction time = 150 min. | 100%          | 30        |
| Photocatalysis | Fe <sub>3</sub> O <sub>4</sub> /g-C <sub>3</sub> N <sub>4</sub> /MoO <sub>3</sub> nanocomposite<br>Xenon lamp (300 W)         | [TCN] <sub>o</sub> = 10 mg/L,<br>[Catalyst] <sub>o</sub> = 1 g/L,<br>pH = 7,<br>T = 25 °C, and<br>reaction time = 60 min.                                       | 98%           | 31        |



|               |           |                                                                                                                                                                 |        |            |
|---------------|-----------|-----------------------------------------------------------------------------------------------------------------------------------------------------------------|--------|------------|
| PI activation | MWLB (25) | [TCN] <sub>0</sub> = 16.52 mg/L,<br>[Catalyst] <sub>0</sub> = 0.83 g/L,<br>[PI] <sub>0</sub> = 2.05 mM,<br>pH = 7,<br>T = 25 °C, and<br>reaction time = 60 min. | 99.64% | This study |
|---------------|-----------|-----------------------------------------------------------------------------------------------------------------------------------------------------------------|--------|------------|

---

## References

- 1 B. Han, E. Zhang, G. Cheng, L. Zhang, D. Wang and X. Wang, *Chemical Engineering Journal*, 2018, 338, 734–744.
- 2 A. Adhikari, L. Lamichhane, A. Adhikari, G. Gyawali, D. Acharya, E. R. Baral and K. Chhetri, *Inorganics (Basel)*, 2022, 10, 113.
- 3 A. Adhikari, K. Chhetri, D. Acharya, B. Pant and A. Adhikari, *Catalysts*, 2022, 12, 1188.
- 4 E. A. El-Bestawy, M. Gaber, H. Shokry and M. Samy, *Environ Res*, 2023, 229, 115987.
- 5 M. M. Gaber, M. Samy and H. Shokry, *Environmental Science and Pollution Research*, 2024, 31, 25163–25181.
- 6 S. Z. Mohammadi, B. Lashkari, A. Khosravan and S. Fouladi, *Journal of Materials Science: Materials in Electronics*, 2022, 33, 11212–11226.
- 7 R. Hao, D. Li, J. Zhang and T. Jiao, *Nanomaterials* 2021, Vol. 11, Page 650, 2021, 11, 650.
- 8 H. Mohammadi, E. Nekobahr, J. Akhtari, M. Saeedi, J. Akbari and F. Fathi, *Toxicol Rep*, 2021, 8, 331.
- 9 K. Petcharoen and A. Sirivat, *Materials Science and Engineering: B*, 2012, 177, 421–427.
- 10 J. Simon, L. Fliri, F. Drexler, M. Bacher, J. Sapkota, M. Ristolainen, M. Hummel, A. Potthast and T. Rosenau, *Carbohydr Polym*, 2023, 310, 120691.
- 11 Y. Liu, K. Zhu, M. Su, H. Zhu, J. Lu, Y. Wang, J. Dong, H. Qin, Y. Wang and Y. Zhang, *RSC Adv*, 2019, 9, 35847–35861.
- 12 M. M. Gaber, M. Samy, E. A. El-Bestawy and H. Shokry, *Chemosphere*, 2024, 352, 141448.
- 13 Y. Xiong, X. Tang, Y. Liu, W. Li, Y. He, Y. Deng, Z. Lin and Y. Zhou, *Sep Purif Technol*, 2024, 333, 125813.
- 14 K. Zhang, S. Zhang, C. Ye, R. Ou, H. Zeng, X. Yu and M. Feng, *Chemical Engineering Journal*, 2023, 451, 138642.
- 15 H. Sun, F. He and W. Choi, *Environ Sci Technol*, 2020, 54, 6427–6437.
- 16 J. Huang, C. Li, H. Hao, L. Li, B. Zhu, X. Chen and H. Tao, *Frontiers in Nanotechnology*, 2022, 4, 1023489.

- 17 APHA; AWWA and WEF, American Public Works Association, 2017, 1469.
- 18 X. Chen, C. Hu, F. Hong, Y. Fang, X. Yuan, H. Tian and Y. Huang, *Journal of Water Process Engineering*, 2024, 65, 105828.
- 19 M. Khajeh, M. M. Amin, A. Fatehizadeh and T. M. Aminabhavi, *Chemical Engineering Journal*, 2021, 416, 129163.
- 20 X. Yang, H. Zhang, S. Cheng and B. Zhou, *RSC Adv*, 2022, 12, 4101–4112.
- 21 G. H. Safari, S. Nasser, A. H. Mahvi, K. Yaghmaeian, R. Nabizadeh and M. Alimohammadi, *J Environ Health Sci Eng*, 2015, 13, 76–76.
- 22 Y. Ji, Y. Shi, W. Dong, X. Wen, M. Jiang and J. Lu, *Chemical Engineering Journal*, 2016, 298, 225–233.
- 23 M. L. Nguyen, H. L. Ngo, T. T. Nguyen Hoang, D. T. Le, D. D. Nguyen, Q. S. Huynh, T. T. Nguyen, T. T. Nguyen and R. S. Juang, *J Environ Health Sci Eng*, 2024, 22, 313–327.
- 24 G. Lu, X. Li, W. Li, Y. Liu, N. Wang, Z. Pan, G. Zhang, Y. Zhang and B. Lai, *J Hazard Mater*, 2024, 461, 132696.
- 25 Z. Wu, Z. Tong, Y. Xie, H. Sun, X. Gong, P. Qin, Y. Liang, X. Yuan, D. Zou and L. Jiang, *Chemical Engineering Journal*, 2022, 434, 134732.
- 26 L. Chen, H. Huang, X. Zhang, W. Tang, J. He and Y. Yang, *Journal of Water Process Engineering*, 2024, 65, 105879.
- 27 W. Wang, K. Xiao, L. Zhu, Y. Yin and Z. Wang, DOI:10.1039/c6ra28224e.
- 28 Y. Xiong, X. Tang, Y. Liu, W. Li, Y. He, Y. Deng, Z. Lin and Y. Zhou, *Sep Purif Technol*, 2024, 333, 125813.
- 29 J. Shan, X. Wu, C. Li, J. Hu, Z. Zhang, H. Liu, P. Xia and X. Huang, *Environmental Science and Pollution Research*, 2023, 30, 8098–8109.
- 30 S. Xu, H. Wei, X. Li, L. Chen and T. Song, *Water Science and Technology*, 2024, 89, 3344–3356.
- 31 T. He, Y. Wu, C. Jiang, Z. Chen, Y. Wang, G. Liu, Z. Xu, G. Ning, X. Chen and Y. Zhao, *PLoS One*, 2020, 15, e0237389.
